# Supplementary material
Source: MDPI journal article supplement (https://www.mdpi.com/2076-3417/13/5/2980)
Supplement: s1 [file s1]

**Table S1.** The elemental content of investigated berry species

| Elements                         | Raspberry                        |         |         | Seaberry |         |         | Blackberry |         |         | Cranberry |         |        | Blueberry |         |        |
|----------------------------------|----------------------------------|---------|---------|----------|---------|---------|------------|---------|---------|-----------|---------|--------|-----------|---------|--------|
|                                  | concentration [mg/kg dry weight] |         |         |          |         |         |            |         |         |           |         |        |           |         |        |
|                                  | min                              | max     | mean    | min      | max     | mean    | min        | max     | mean    | min       | max     | mean   | min       | max     | mean   |
| Na                               | 5.50                             | 100.71  | 26.11   | 122.22   | 294.13  | 187.77  | 6.32       | 54.40   | 28.22   | 3.50      | 86.38   | 27.50  | 0.92      | 144.36  | 39.55  |
| Mg                               | 335.00                           | 819.40  | 601.57  | 246.43   | 599.09  | 445.50  | 457.54     | 787.55  | 593.43  | 372.88    | 456.88  | 412.41 | 122.86    | 626.20  | 332.35 |
| P                                | 958.73                           | 1974.09 | 1531.38 | 743.65   | 1711.93 | 1293.78 | 873.41     | 2182.65 | 1473.18 | 542.92    | 1033.30 | 752.58 | 284.34    | 1366.21 | 730.34 |
| Ca                               | 292.90                           | 1094.19 | 606.47  | 119.76   | 361.60  | 245.15  | 689.42     | 1456.74 | 866.07  | 417.70    | 1020.56 | 623.01 | 222.83    | 1081.51 | 559.58 |
| Li                               | 0.001                            | 0.19    | 0.05    | 0.05     | 0.75    | 0.29    | 0.001      | 0.34    | 0.09    | 0.001     | 0.18    | 0.09   | 0.001     | 0.35    | 0.10   |
| Ti                               | 1.26                             | 3.35    | 2.62    | 2.11     | 4.16    | 3.02    | 0.77       | 7.51    | 3.48    | 1.71      | 9.64    | 4.76   | 0.93      | 3.31    | 2.47   |
| V                                | 0.001                            | 0.06    | 0.02    | 0.01     | 0.17    | 0.07    | 0.02       | 0.15    | 0.06    | 0.001     | 0.13    | 0.05   | 0.001     | 0.17    | 0.02   |
| Cr                               | 0.71                             | 9.33    | 3.27    | 0.59     | 4.45    | 2.22    | 0.46       | 11.44   | 4.55    | 0.28      | 6.98    | 2.27   | 0.38      | 9.21    | 2.61   |
| Mn                               | 7.33                             | 81.80   | 28.41   | 5.47     | 9.92    | 7.57    | 6.92       | 112.17  | 27.42   | 38.55     | 175.64  | 94.77  | 9.87      | 85.38   | 46.81  |
| Fe                               | 15.28                            | 79.93   | 37.13   | 17.05    | 38.38   | 27.56   | 13.04      | 86.15   | 43.41   | 10.25     | 72.91   | 33.81  | 8.51      | 81.32   | 28.10  |
| Co                               | 0.06                             | 0.19    | 0.09    | 0.03     | 0.09    | 0.05    | 0.06       | 0.16    | 0.10    | 0.05      | 0.11    | 0.07   | 0.04      | 0.10    | 0.06   |
| Ni                               | 0.67                             | 4.43    | 1.94    | 1.25     | 5.89    | 2.62    | 0.57       | 2.82    | 1.66    | 0.62      | 2.48    | 1.08   | 0.16      | 1.91    | 0.88   |
| Cu                               | 2.75                             | 62.96   | 16.25   | 4.79     | 30.24   | 13.82   | 6.38       | 27.68   | 12.75   | 5.86      | 78.84   | 21.96  | 2.89      | 39.05   | 13.29  |
| Zn                               | 9.87                             | 25.35   | 16.36   | 5.05     | 15.67   | 10.36   | 3.79       | 21.79   | 9.97    | 8.18      | 13.49   | 10.43  | 2.29      | 13.46   | 7.01   |
| Ga                               | 0.002                            | 0.04    | 0.02    | 0.004    | 0.07    | 0.02    | 0.01       | 0.12    | 0.03    | 0.02      | 0.08    | 0.03   | 0.003     | 0.05    | 0.02   |
| As                               | 0.06                             | 0.60    | 0.25    | 0.01     | 0.31    | 0.11    | 0.001      | 0.29    | 0.11    | 0.02      | 0.51    | 0.11   | 0.001     | 0.16    | 0.05   |
| Rb                               | 0.69                             | 36.43   | 6.52    | 5.12     | 17.47   | 9.75    | 0.92       | 25.85   | 8.58    | 9.81      | 40.14   | 26.14  | 1.17      | 57.61   | 20.81  |
| Sr                               | 0.89                             | 5.40    | 2.45    | 1.59     | 3.28    | 2.29    | 1.66       | 16.07   | 6.15    | 0.73      | 2.92    | 1.80   | 0.80      | 3.61    | 2.08   |
| Cd                               | 0.003                            | 0.34    | 0.07    | 0.01     | 0.13    | 0.04    | 0.0005     | 0.03    | 0.01    | 0.01      | 0.10    | 0.02   | 0.002     | 0.03    | 0.01   |
| Ba                               | 0.38                             | 4.09    | 1.32    | 0.12     | 1.27    | 0.52    | 0.49       | 4.81    | 1.87    | 6.57      | 12.86   | 9.20   | 1.78      | 14.47   | 6.98   |
| Pb                               | 0.01                             | 0.10    | 0.05    | 0.03     | 0.21    | 0.10    | 0.02       | 0.16    | 0.08    | 0.01      | 0.63    | 0.17   | 0.003     | 0.76    | 0.13   |
| concentration [µg/kg dry weight] |                                  |         |         |          |         |         |            |         |         |           |         |        |           |         |        |
| Ag                               | 1.00                             | 29.36   | 11.54   | 1.00     | 29.40   | 14.01   | 0.29       | 37.07   | 8.58    | 0.64      | 72.96   | 20.49  | 0.33      | 75.69   | 16.92  |
| La                               | 0.34                             | 8.19    | 3.26    | 2.82     | 14.00   | 6.75    | 0.37       | 5.82    | 2.86    | 0.60      | 21.86   | 10.48  | 1.63      | 73.88   | 14.46  |
| Ce                               | 0.24                             | 46.64   | 15.33   | 10.44    | 38.94   | 24.98   | 1.96       | 18.33   | 9.03    | 5.96      | 69.24   | 22.84  | 6.83      | 92.04   | 20.89  |
| Pr                               | 0.17                             | 1.99    | 1.10    | 0.56     | 3.50    | 1.81    | 0.19       | 1.96    | 0.81    | 0.64      | 6.79    | 2.61   | 0.33      | 62.66   | 7.34   |
| Nd                               | 0.15                             | 4.47    | 0.94    | 1.37     | 13.12   | 4.50    | 0.15       | 0.98    | 0.41    | 0.15      | 6.79    | 5.03   | 0.15      | 18.55   | 3.48   |
| Sm                               | 0.15                             | 1.99    | 0.40    | 0.14     | 0.46    | 0.24    | 0.15       | 0.97    | 0.32    | 0.15      | 2.83    | 0.70   | 0.14      | 20.77   | 2.73   |
| Eu                               | 0.15                             | 1.46    | 0.55    | 0.25     | 0.90    | 0.60    | 0.16       | 1.45    | 0.46    | 0.46      | 1.75    | 1.07   | 0.45      | 6.23    | 1.57   |
| Gd                               | 0.15                             | 9.77    | 2.04    | 0.14     | 0.25    | 0.20    | 0.15       | 7.74    | 1.65    | 0.16      | 4.24    | 1.33   | 0.14      | 5.19    | 0.74   |
| Tb                               | 0.16                             | 0.97    | 0.41    | 0.23     | 0.90    | 0.40    | 0.15       | 0.48    | 0.27    | 0.15      | 1.13    | 0.50   | 0.14      | 1.38    | 0.53   |

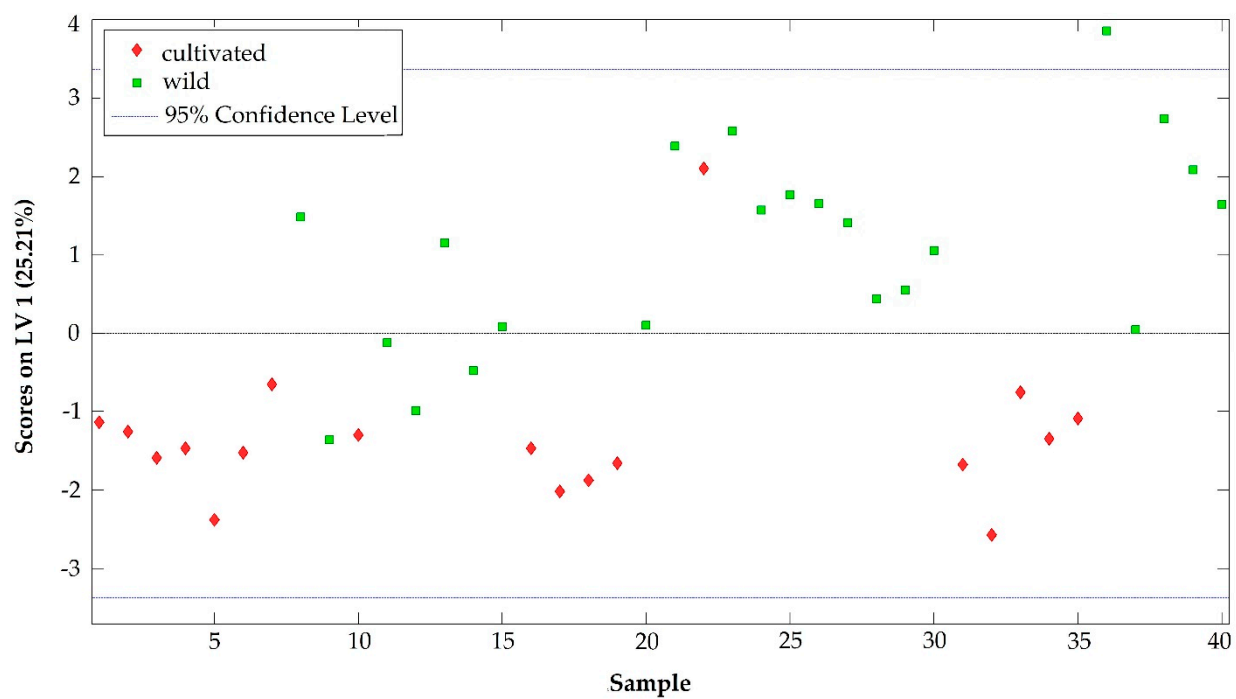

**Figure S1.** PLS-DA score plot associated to the classification of berries samples according to the growing system.
